# Supplementary material for: A nanofabricated planar aperture as a mimic of the nerve–muscle contact during synaptogenesis
Source: Royal Society of Chemistry journal article supplement (doi:10.1039/b517475a), 2006-01-01
Supplement: b517475a-movie.pdf [file b517475a-movie.pdf]

**Supplementary Movie:** Agrin-induced clustering of AChRs on cultured myotubes. AChR clusters were visualized by pre-labeling the C2C12 myotubes with  $\alpha$ -bungarotoxin conjugated with Alexa Fluor<sup>®</sup> 488 for 1 hour (10 ng/ml). Excess bungarotoxin conjugate was removed prior to agrin exposure. Image capture was started immediately after the addition of agrin (1  $\mu$ g/ml [1]). Images were acquired every 30 minutes and the cells were kept at a constant temperature of 37 °C under a humidified atmosphere of 5% CO<sub>2</sub> and 95% air. A total of 23 images were acquired for the image stack and converted into an AVI format.

[1] Ferns, M., Deiner, M. & Hall, Z. (1996) *J. Cell. Biol.* **132**, 937-944.
