# Supplementary material for: A nanofabricated planar aperture as a mimic of the nerve–muscle contact during synaptogenesis
Source: Royal Society of Chemistry journal article supplement (doi:10.1039/b517475a), 2006-01-01
Supplement: b517475a-sf2.pdf [file b517475a-sf2.pdf]

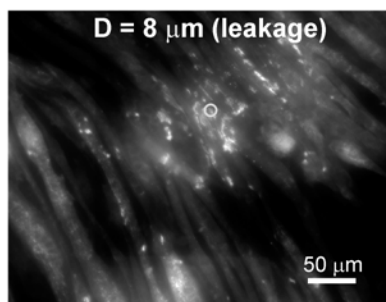

**Supplementary Figure 2:** Fluorescence micrograph of AChR clusters on multiple myotubes caused by a suspected agrin leakage. The occasionally observed spreading of the AChR clusters over a large area, as illustrated in this image, was possibly caused by the extensive leakage of agrin due to a poor seal between the aperture and the cell(s) covering it.
